# Supplementary material
Source: publisher figshare collection journal article supplement (https://gsajournals.figshare.com/articles/dataset/_/13542158)
Supplement: Supplementary file 1 [file 1]

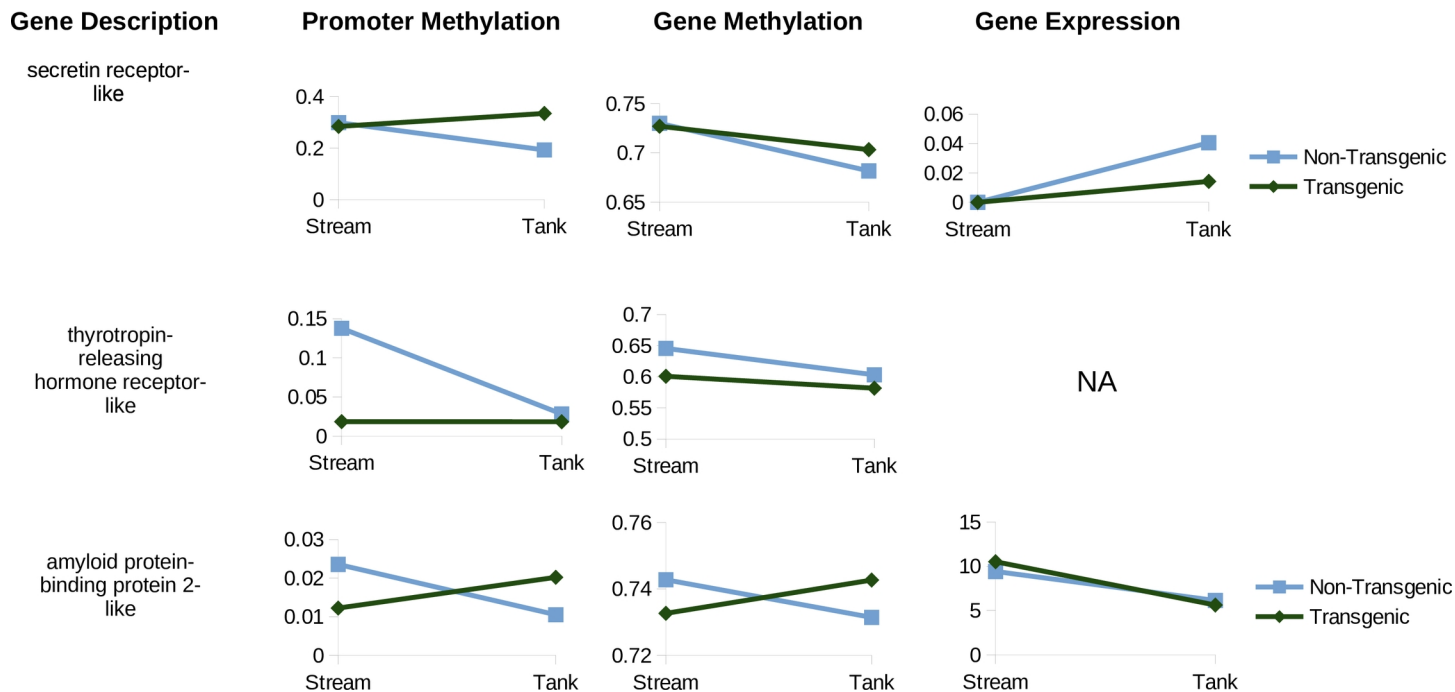

**Figure S5. Transcription factors with significant GxE interaction in the promoter region.** Average values for methylation in promoter and gene regions (fraction methylated) are shown with gene expression data (CPM).
