# Supplementary material
Source: publisher figshare collection journal article supplement (https://gsajournals.figshare.com/articles/dataset/_/13542158)
Supplement: Supplementary file 2 [file 1]

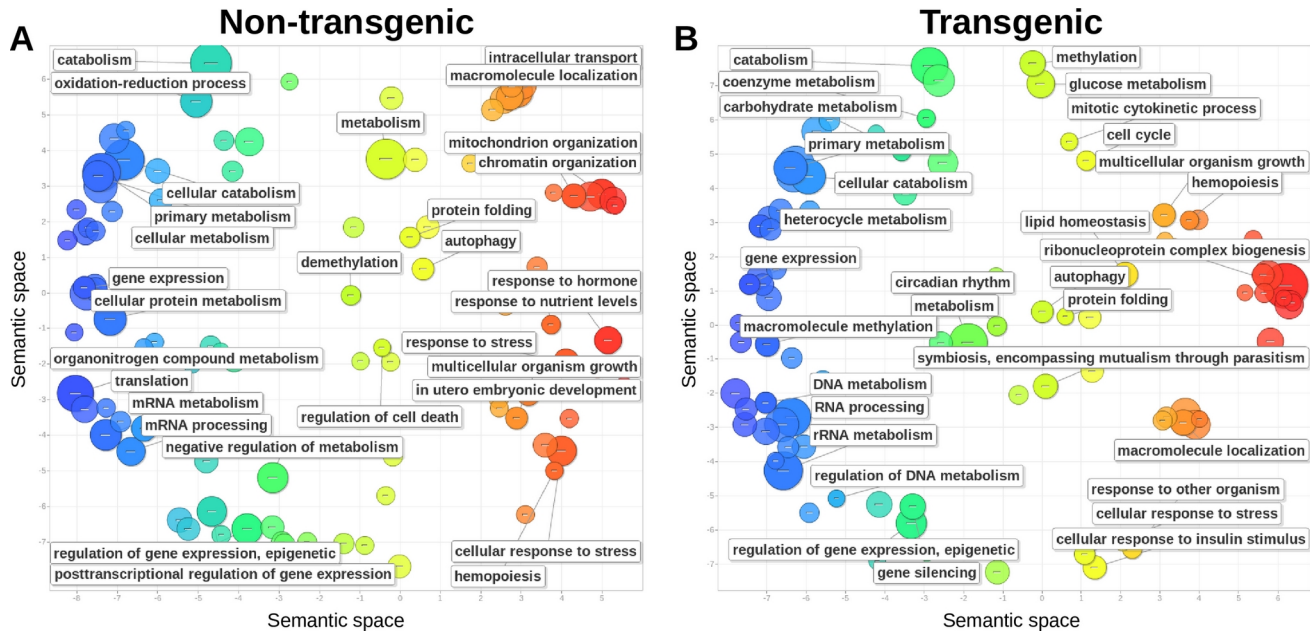

**Figure S2. Enriched GO terms identified from genes with differential gene transcription between stream and tank environments for A) non-transgenic and B) transgenic coho salmon.** GO terms complexity was reduced using Revigo software. Larger circles have lower p-values and the colour reflects semantic space. The x and y-axes are coordinates from multidimensional scaling of GO term semantic similarities into two dimensions.
