# Supplementary material
Source: publisher figshare collection journal article supplement (https://gsajournals.figshare.com/articles/dataset/_/13542158)
Supplement: Supplementary file 3 [file 1]

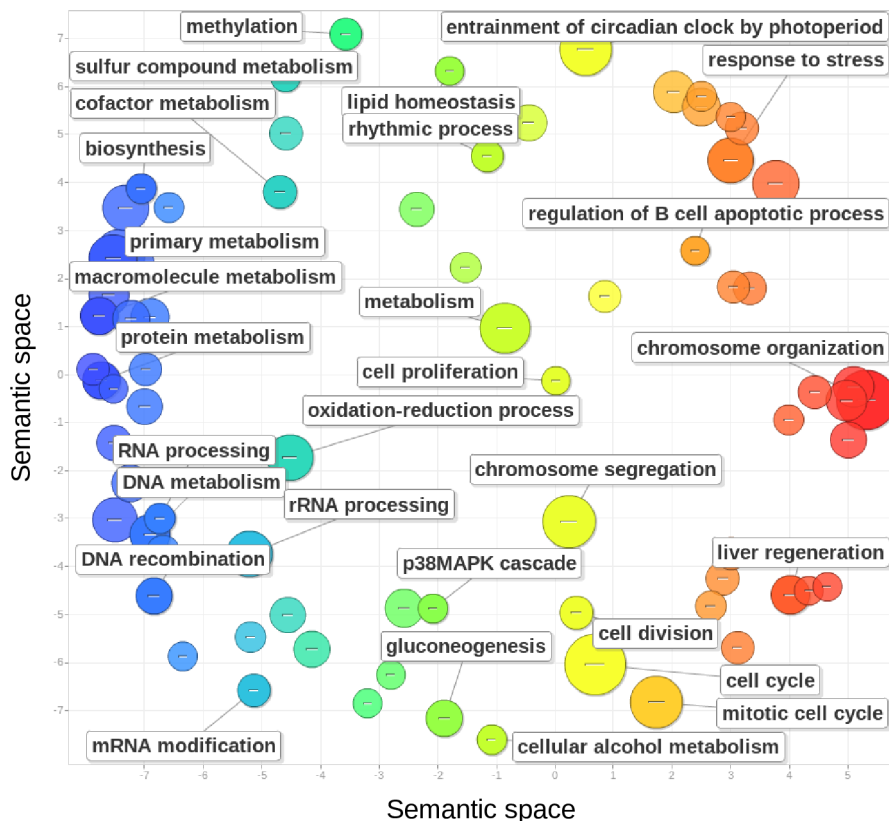

**Figure S1. Enriched GO terms identified from genes with differential gene transcription between non-transgenic and transgenic coho salmon in a tank environment.** GO terms complexity was reduced using Revigo software. Larger circles have lower p-values and the colour reflects semantic space. The x and y-axes are coordinates from multidimensional scaling of GO term semantic similarities into two dimensions.
