# Supplementary material
Source: publisher figshare collection journal article supplement (https://gsajournals.figshare.com/articles/dataset/_/13542158)
Supplement: Supplementary file 6 [file 1]

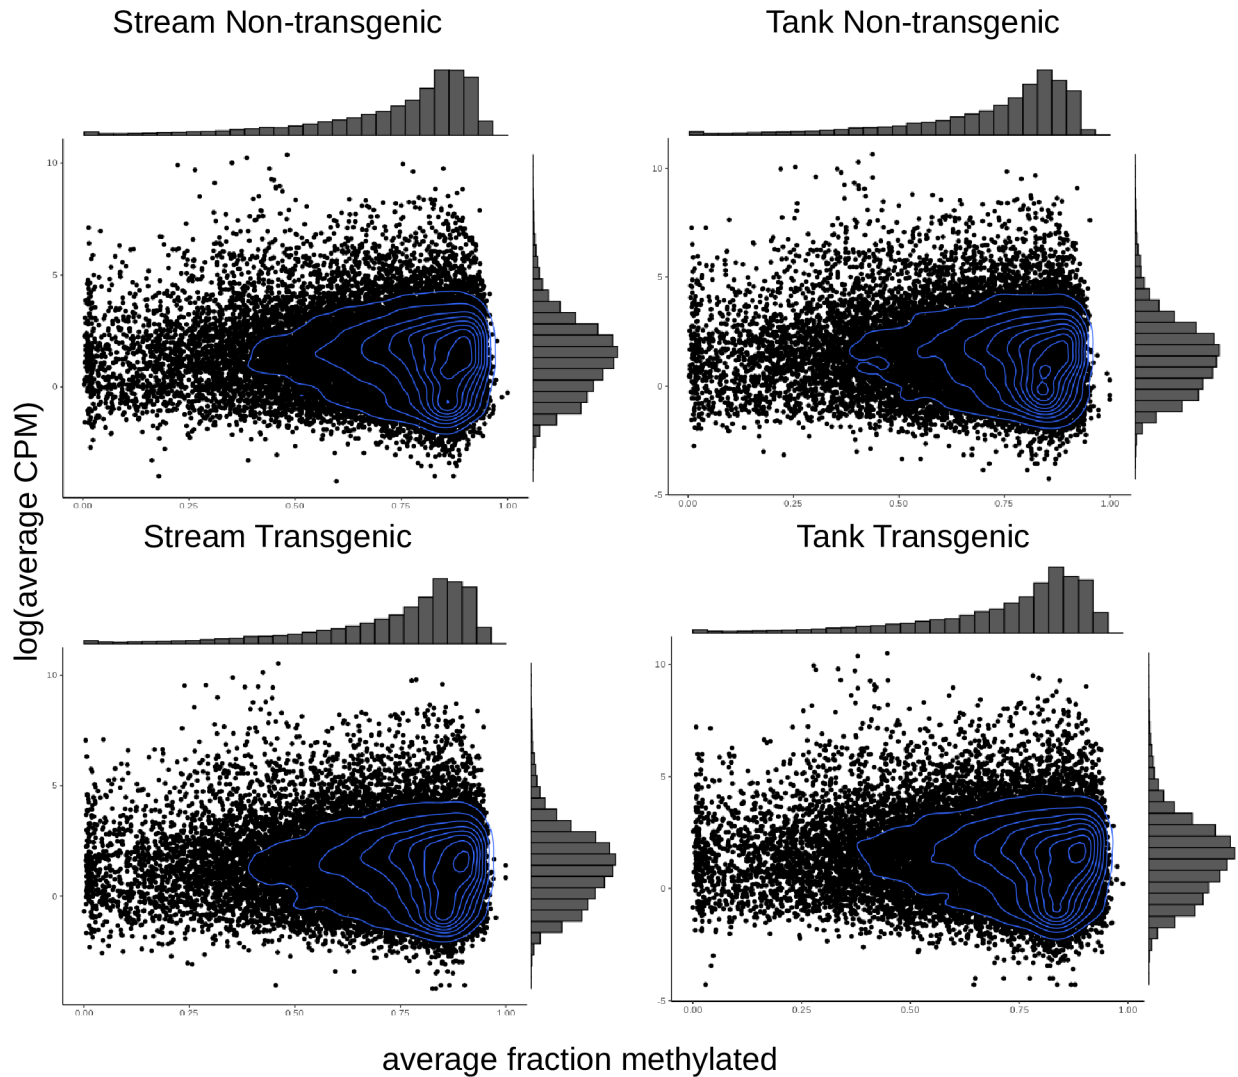

**Figure S4. Gene expression values (average counts per million) plotted against gene region methylation data (average fraction methylated).** Histograms are printed on the side to show where the majority of data points cluster. The blue density graph overlay is used to show the density of the data.
